# Supplementary material for: Participation in the nationwide cervical cancer screening programme in Denmark during the COVID-19 pandemic: An observational study
Source: eLife. 2023 Jan 20;12:e81522. doi: 10.7554/eLife.81522 (PMC9904756; doi:10.7554/eLife.81522)
Supplement: Supplementary file 1. [file elife-81522-supp1.xlsx]

## Sheet: 90days_prop
Supplementary Table 1. Proportion of women participating in cervical cancer screening in Denmark within 90 days since invitation from 2015 to 2021
	Pre-pandemic (01Jan2015-31Jan2020)	Pre-lockdown (01Feb2020-10Mar2020)	1st lockdown (11Mar2020-15Apr2020)	1st re-opening (16Apr2020-15Dec2020)	2nd lockdown (16Dec2020-27Feb2021)	2nd re-opening (28Feb2021-30Sep2021)
	%	%	%	%	%	%
Total	36.238	20.587	26.7189	31.9716	34.3286	32.2542
Age at invitation
23-29 years	28.922	16.8346	21.1098	25.5442	27.5363	24.7131
30-39 years	33.5343	19.3706	25.8169	29.4718	30.6642	29.1813
40-49 years	39.1746	21.5288	28.7122	35.0921	37.5256	36.7702
50-59 years	41.7736	25.3113	30.8977	38.4461	41.2616	38.9588
60-64 years	47.0018	25.2375	34.2748	42.0019	45.5758	43.2715
Ethnicity
Danish descent	38.8952	22.443	28.9976	35.268	36.7931	35.6802
Descendant of immigrant	17.5819	9.36819	12.42	14.7999	16.4286	16.5164
Western immigrant	20.9414	12.1658	16.9789	17.4365	23.6526	21.5654
Non-western immigrant	26.0557	13.6229	16.4519	21.5213	23.195	22.6861
Cohabitation status
Living alone	30.0783	17.0922	22.1262	26.4986	24.903	N/A
Cohabiting	34.354	20.0976	26.241	31.1816	31.4057	N/A
Married	41.444	23.4145	30.3734	36.8088	35.6904	N/A
Educational level (ISCED)
ISCED15 level 1-2	36.4373	20.955	26.1585	32.2935	34.3794	32.9453
ISCED15 level 3-5	37.9527	21.08	28.3592	33.7548	36.6981	34.4506
ISCED15 level 6-8	34.2979	19.0317	27.2609	30.39	34.6407	33.1518
Disposable income
Lowest quintile	26.0475	14.5437	17.4817	23.026	24.1054	22.6941
Second quintile	31.6321	17.6455	21.3508	26.7778	28.788	26.8832
Third quintile	38.0615	21.6464	27.641	32.5184	33.0721	31.7534
Fourth quintile	42.8232	24.047	31.9739	38.6331	39.9929	37.8824
Highest quintile	44.635	25.6535	34.1524	41.937	43.5633	42.747
Healthcare usage
Rare	26.2127	13.4992	18.0451	21.0357	23.0224	19.7189
Low	34.2095	18.4146	24.2397	30.6442	31.7766	30.7858
Average	37.5771	21.1578	27.0002	34.1272	35.5472	34.3608
High	40.2926	23.8956	29.9109	36.4471	38.652	36.8266
Frequent	43.6285	26.8259	34.638	39.4479	42.7919	40.7927
ISCED=International Standard Classification of Education; Information on cohabitation status was only available from Statistics Denmark until the end of February 2021, whereas all other socioeconomic variables were available until end of the study period.
