# Supplementary material for: Participation in the nationwide cervical cancer screening programme in Denmark during the COVID-19 pandemic: An observational study
Source: eLife. 2023 Jan 20;12:e81522. doi: 10.7554/eLife.81522 (PMC9904756; doi:10.7554/eLife.81522)
Supplement: Supplementary file 2. [file elife-81522-supp2.xlsx]

## Sheet: 180days_prop
Supplementary Table 2. Proportion of women participating in cervical cancer screening in Denmark within 180 days since invitation from 2015 to 2021
	Pre-pandemic (01Jan2015-31Jan2020)	Pre-lockdown (01Feb2020-10Mar2020)	1st lockdown (11Mar2020-15Apr2020)	1st re-opening (16Apr2020-15Dec2020)	2nd lockdown (16Dec2020-27Feb2021)	2nd re-opening (28Feb2021-30Jun2021)
	%	%	%	%	%	%
Total	53.8029	44.264	46.127	48.9793	50.1169	49.4868
Age at invitation
23-29 years	44.7548	35.9679	38.2227	40.6614	41.1428	39.8275
30-39 years	51.3617	41.2757	44.3465	46.4611	46.9694	46.6942
40-49 years	58.6782	47.8723	49.4206	54.1614	54.7478	55.2896
50-59 years	58.4444	52.093	52.3629	55.0788	57.2989	56.4206
60-64 years	62.7956	55.285	54.9618	58.277	61.1217	60.1505
Ethnicity
Danish descent	57.3703	47.95	49.6043	53.4053	53.3988	53.5525
Descendant of immigrant	28.3225	21.2418	20.1024	25.0917	24.5238	26.4759
Western immigrant	33.4317	27.2762	30.2115	30.0775	35.4789	35.0753
Non-western immigrant	40.1533	30.7657	32.144	34.7742	36.8421	36.4992
Cohabitation status
Living alone	45.3419	37.4234	38.5534	41.3812	39.3328	N/A
Cohabiting	52.0067	42.4499	45.5996	48.3813	47.2773	N/A
Married	60.5922	50.2329	52.0372	55.4436	54.7142	N/A
Educational level (ISCED)
ISCED15 level 1-2	53.8425	44.4671	45.5456	49.3478	49.9914	49.7948
ISCED15 level 3-5	55.9529	46.0088	47.7915	51.232	52.8798	52.0766
ISCED15 level 6-8	52.1018	41.8576	47.1739	47.2573	51.794	51.3921
Disposable income
Lowest quintile	40.619	31.6754	32.9187	37.1858	36.744	36.3288
Second quintile	46.8057	37.2619	37.5808	41.6807	42.7536	41.1464
Third quintile	55.5412	45.3881	46.3932	49.4922	48.7988	48.1926
Fourth quintile	62.8465	51.9177	53.6517	58.072	57.0339	56.3391
Highest quintile	65.9335	55.8178	58.4618	62.3978	62.3492	63.1371
Healthcare usage
Rare	41.158	31.6939	34.4528	34.65	35.1897	33.519
Low	52.0456	42.7051	43.2536	48.1338	47.9217	47.9421
Average	56.1005	45.7981	47.4461	52.0104	52.548	51.968
High	58.87	49.4263	50.7246	55.0373	55.942	54.9744
Frequent	61.5266	52.8389	54.9739	57.2914	59.0336	59.2951
ISCED=International Standard Classification of Education; Information on cohabitation status was only available from Statistics Denmark until the end of February 2021, whereas all other socioeconomic variables were available until end of the study period.
