# Supplementary material for: Participation in the nationwide cervical cancer screening programme in Denmark during the COVID-19 pandemic: An observational study
Source: eLife. 2023 Jan 20;12:e81522. doi: 10.7554/eLife.81522 (PMC9904756; doi:10.7554/eLife.81522)
Supplement: Supplementary file 3. [file elife-81522-supp3.xlsx]

## Sheet: 365days_prop
Supplementary File 3 Table 3. Proportion of women participating in cervical cancer screening in Denmark within 365 days since invitation from 2015 to 2021
	Pre-pandemic (01Jan2015-31Jan2020)	Pre-lockdown (01Feb2020-10Mar2020)	1st lockdown (11Mar2020-15Apr2020)	1st re-opening (16Apr2020-15Dec2020)	2nd lockdown (16Dec2020-31Dec2020)
	%	%	%	%	%
Total	64.9014	60.4595	60.208	60.3382	57.3254
Age at invitation
23-29 years	57.0395	51.5211	52.5288	52.4578	50.2905
30-39 years	64.3432	58.9787	59.8937	59.6622	57.2768
40-49 years	69.8647	64.7833	63.9662	65.5499	59.2431
50-59 years	66.4087	66.3616	64.2437	63.6319	63.1747
60-64 years	69.0062	68.1116	64.6565	65.9479	59.4436
Ethnicity
Danish descent	68.6505	64.6623	64.1361	65.0622	61.78
Descendant of immigrant	37.8474	33.6601	30.4738	34.0556	28.8889
Western immigrant	43.7727	41.6893	42.5982	41.2943	38.1173
Non-western immigrant	50.4742	44.8914	44.3013	44.6228	42.6337
Cohabitation status
Living alone	55.9875	52.152	51.4563	52.0532	47.9183
Cohabiting	64.4241	59.8808	60.8874	61.0512	59.1389
Married	71.4019	66.9349	66.4253	66.676	64.0801
Educational level (ISCED)
ISCED15 level 1-2	64.7566	60.3897	59.6079	60.5681	56.7702
ISCED15 level 3-5	67.036	62.6019	61.9843	62.5435	60.9691
ISCED15 level 6-8	63.7735	58.886	61.1739	59.3828	59.4345
Disposable income
Lowest quintile	51.9914	46.8122	46.4645	48.6521	46.1201
Second quintile	57.4614	51.8723	50.6635	52.5715	50.5931
Third quintile	66.3619	61.0588	60.1709	60.5266	55.7221
Fourth quintile	73.9335	68.8168	68.7083	69.5464	65.1402
Highest quintile	77.4374	74.4568	73.437	74.2729	71.4706
Healthcare usage
Rare	51.4961	46.6839	46.3826	45.255	42.246
Low	63.559	59.9224	58.3702	59.7369	54.914
Average	67.6322	62.5714	62.1064	63.6972	62.3732
High	70.1665	66.0293	65.3047	66.7706	64.0887
Frequent	72.239	68.1466	68.9172	68.4981	64.4109
ISCED=International Standard Classification of Education
