# Supplementary material for: Participation in the nationwide cervical cancer screening programme in Denmark during the COVID-19 pandemic: An observational study
Source: eLife. 2023 Jan 20;12:e81522. doi: 10.7554/eLife.81522 (PMC9904756; doi:10.7554/eLife.81522)
Supplement: Supplementary file 4. [file elife-81522-supp4.xlsx]

## Sheet: S Table 4 PR 90 days full adj
Supplementary File 4 Table 4. Prevalence ratios and 95% confidence intervals of participation in cervical cancer screening in Denmark within 90 days since invitation from 2015 to 2021*
		Pre-pandemic (01Jan2015-31Jan2020)		Pre-lockdown (01Feb2020-10Mar2020)		1st lockdown (11Mar2020-15Apr2020)		1st re-opening (16Apr2020-15Dec2020)		2nd lockdown (16Dec2020-27Feb2021)		2nd re-opening (28Feb2021-30Sep2021)
		N=1641199		N=41876		N=31255		N=223386		N=69729		N=212555
	N	PR	[95%CI]	PR	[95%CI]	PR	[95%CI]	PR	[95%CI]	PR	[95%CI]	PR	[95%CI]
Overall	2220000	1	-	0.57622	[0.56; 0.59]	0.759987	[0.75; 0.77]	0.955681	[0.95; 0.96]	0.986415	[0.97; 1.00]	0.974845	[0.97; 0.98]
Age at invitation
23-29 years	535235	1	-	0.598649	[0.57; 0.63]	0.758846	[0.72; 0.79]	0.938187	[0.92; 0.96]	0.993578	[0.97; 1.02]	0.9174	[0.90; 0.94]
30-39 years	559296	1	-	0.60074	[0.58; 0.63]	0.800816	[0.77; 0.83]	0.953745	[0.94; 0.97]	0.982846	[0.96; 1.01]	0.956549	[0.94; 0.97]
40-49 years	659365	1	-	0.541416	[0.52; 0.56]	0.733109	[0.71; 0.76]	0.949365	[0.94; 0.96]	0.979149	[0.96; 1.00]	0.997299	[0.98; 1.01]
50-59 years	336786	1	-	0.599696	[0.57; 0.63]	0.757037	[0.73; 0.79]	0.974918	[0.96; 0.99]	0.99082	[0.97; 1.02]	1.00223	[0.98; 1.02]
60-64 years	129318	1	-	0.525365	[0.48; 0.57]	0.751231	[0.69; 0.81]	0.967365	[0.94; 1.00]	0.992784	[0.95; 1.03]	1.01203	[0.98; 1.04]
Ethnicity
Danish descent	1773076	1	-	0.575591	[0.56; 0.59]	0.756025	[0.74; 0.77]	0.955488	[0.95; 0.96]	0.958632	[0.95; 0.97]	0.958055	[0.95; 0.97]
Descendant of immigrant	43902	1	-	0.550537	[0.44; 0.68]	0.777256	[0.64; 0.95]	0.923923	[0.85; 1.00]	0.95784	[0.83; 1.10]	0.948737	[0.86; 1.05]
Western Immigrant	120162	1	-	0.632414	[0.57; 0.71]	0.885874	[0.79; 0.99]	1.0036	[0.96; 1.05]	1.20706	[1.12; 1.30]	1.22567	[1.16; 1.29]
Non-western immigrant	218679	1	-	0.557134	[0.52; 0.60]	0.698927	[0.64; 0.76]	0.982521	[0.95; 1.01]	0.969782	[0.92; 1.02]	1.04324	[1.01; 1.08]
Cohabitation status
Living alone	633585	1	-	0.576906	[0.55; 0.60]	0.767219	[0.74; 0.80]	0.960166	[0.95; 0.98]	0.947328	[0.89; 1.00]	N/A	N/A
Cohabiting	420793	1	-	0.587484	[0.56; 0.61]	0.777682	[0.75; 0.81]	0.946732	[0.93; 0.96]	0.97152	[0.91; 1.03]	N/A	N/A
Married	892913	1	-	0.574173	[0.56; 0.59]	0.75869	[0.74; 0.78]	0.956101	[0.95; 0.97]	0.912755	[0.88; 0.95]	N/A	N/A
Educational level (ISCED)
ISCED15 level 1-2	1297050	1	-	0.57632	[0.56; 0.59]	0.747088	[0.73; 0.77]	0.958184	[0.95; 0.97]	0.983768	[0.97; 1.00]	0.984038	[0.97; 1.00]
ISCED15 level 3-5	529165	1	-	0.561323	[0.54; 0.58]	0.761261	[0.73; 0.79]	0.951616	[0.94; 0.97]	0.99372	[0.97; 1.02]	0.983812	[0.97; 1.00]
ISCED15 level 6-8	319925	1	-	0.602146	[0.57; 0.63]	0.805597	[0.76; 0.85]	0.991027	[0.97; 1.01]	1.07332	[1.04; 1.11]	1.09235	[1.07; 1.12]
Disposable income
Lowest quintile	419122	1	-	0.568888	[0.54; 0.60]	0.708389	[0.67; 0.75]	0.95251	[0.93; 0.97]	0.979725	[0.94; 1.02]	0.957893	[0.93; 0.98]
Second quintile	422225	1	-	0.579707	[0.55; 0.61]	0.722971	[0.69; 0.76]	0.936632	[0.92; 0.96]	0.966566	[0.94; 1.00]	0.957128	[0.94; 0.98]
Third quintile	424081	1	-	0.583606	[0.56; 0.61]	0.758019	[0.73; 0.79]	0.93881	[0.92; 0.96]	0.924155	[0.90; 0.95]	0.931393	[0.91; 0.95]
Fourth quintile	425069	1	-	0.563542	[0.54; 0.59]	0.756363	[0.73; 0.79]	0.953981	[0.94; 0.97]	0.970235	[0.95; 0.99]	0.947677	[0.93; 0.96]
Highest quintile	424457	1	-	0.566764	[0.55; 0.59]	0.756107	[0.73; 0.78]	0.956033	[0.94; 0.97]	0.979857	[0.96; 1.00]	0.978796	[0.96; 0.99]
Healthcare usage
Rare	439469	1	-	0.53569	[0.51; 0.57]	0.738923	[0.70; 0.78]	0.962036	[0.94; 0.98]	0.954031	[0.92; 0.99]	0.924422	[0.90; 0.95]
Low	491164	1	-	0.534762	[0.51; 0.56]	0.725245	[0.69; 0.76]	0.93983	[0.92; 0.96]	0.937176	[0.91; 0.96]	0.955236	[0.94; 0.97]
Average	467980	1	-	0.566604	[0.54; 0.59]	0.73669	[0.71; 0.77]	0.957362	[0.94; 0.97]	0.976347	[0.95; 1.00]	0.974571	[0.96; 0.99]
High	404486	1	-	0.596853	[0.57; 0.62]	0.757164	[0.73; 0.79]	0.950353	[0.93; 0.97]	0.988199	[0.96; 1.01]	0.96676	[0.95; 0.98]
Frequent	416901	1	-	0.61922	[0.60; 0.64]	0.797867	[0.77; 0.83]	0.95811	[0.94; 0.97]	1.00558	[0.98; 1.03]	0.991247	[0.97; 1.01]
* Adjusted for month, year and age at invitation; PR=prevalence ratio; CI=confidence interval; ISCED=International Standard Classification of Education; Information on cohabitation status was only available from Statistics Denmark until the end of February 2021, whereas all other socioeconomic variables were available until end of the study period.
