# Supplementary material for: Participation in the nationwide cervical cancer screening programme in Denmark during the COVID-19 pandemic: An observational study
Source: eLife. 2023 Jan 20;12:e81522. doi: 10.7554/eLife.81522 (PMC9904756; doi:10.7554/eLife.81522)
Supplement: Supplementary file 5. [file elife-81522-supp5.xlsx]

## Sheet: S Table 5 PR 180 days fulladj
Supplementary File 5 Table 5. Prevalence ratios and 95% confidence intervals of participation in cervical cancer screening in Denmark within 180 days since invitation from 2015 to 2021*
		Pre-pandemic (01Jan2015-31Jan2020)		Pre-lockdown (01Feb2020-10Mar2020)		1st lock-down (11Mar2020-15Apr2020)		1st re-opening (16Apr2020-15Dec2020)		2nd lock-down (16Dec2020-27Feb2021)		2nd re-opening (28Feb2021-30June2021)
		N=1641199		N=41876		N=31255		N=223386		N=69729		N=212555
	N	PR	[95%CI]	PR	[95%CI]	PR	[95%CI]	PR	[95%CI]	PR	[95%CI]	PR	[95%CI]
Overall	2220000	1	-	0.886061	[0.88; 0.90]	0.917513	[0.91; 0.93]	0.987791	[0.98; 0.99]	1.01905	[1.01; 1.03]	1.00331	[1.00; 1.01]
Age at invitation
23-29 years	535235	1	-	0.88815	[0.86; 0.91]	0.918652	[0.89; 0.95]	0.975173	[0.96; 0.99]	1.02099	[1.00; 1.04]	0.976844	[0.96; 0.99]
30-39 years	559296	1	-	0.886259	[0.86; 0.91]	0.938765	[0.91; 0.96]	0.989882	[0.98; 1.00]	1.02834	[1.01; 1.05]	1.00855	[0.99; 1.02]
40-49 years	659365	1	-	0.85905	[0.84; 0.88]	0.878956	[0.86; 0.90]	0.97882	[0.97; 0.99]	1.00382	[0.99; 1.02]	0.994297	[0.98; 1.01]
50-59 years	336786	1	-	0.923549	[0.90; 0.95]	0.945735	[0.92; 0.97]	1.00277	[0.99; 1.02]	1.02663	[1.01; 1.05]	1.0301	[1.01; 1.05]
60-64 years	129318	1	-	0.879192	[0.84; 0.92]	0.905396	[0.86; 0.95]	0.968456	[0.95; 0.99]	1.0049	[0.97; 1.04]	0.99143	[0.97; 1.02]
Ethnicity
Danish descent	1773076	1	-	0.883822	[0.87; 0.89]	0.909241	[0.90; 0.92]	0.985438	[0.98; 0.99]	0.992089	[0.98; 1.00]	0.983597	[0.98; 0.99]
Descendant of immigrant	43902	1	-	0.839069	[0.73; 0.96]	0.815362	[0.70; 0.95]	0.964417	[0.91; 1.02]	0.93155	[0.84; 1.04]	0.961337	[0.88; 1.05]
Western Immigrant	120162	1	-	0.922525	[0.86; 0.99]	1.00507	[0.93; 1.09]	1.0645	[1.03; 1.10]	1.17531	[1.11; 1.24]	1.17902	[1.12; 1.24]
Non-western immigrant	218679	1	-	0.886003	[0.84; 0.93]	0.924564	[0.88; 0.98]	1.02096	[1.00; 1.04]	1.08295	[1.04; 1.12]	1.08518	[1.05; 1.12]
Cohabitation status
Living alone	633585	1	-	0.883711	[0.86; 0.90]	0.907006	[0.88; 0.93]	0.996236	[0.99; 1.01]	1.02561	[0.98; 1.07]	N/A	N/A
Cohabiting	420793	1	-	0.872571	[0.85; 0.90]	0.919526	[0.89; 0.95]	0.979641	[0.97; 0.99]	1.00999	[0.97; 1.06]	N/A	N/A
Married	892913	1	-	0.889404	[0.88; 0.90]	0.919948	[0.90; 0.94]	0.987508	[0.98; 0.99]	1.00661	[0.98; 1.03]	N/A	N/A
Educational level (ISCED)
ISCED15 level 1-2	1297050	1	-	0.886946	[0.87; 0.90]	0.9096	[0.89; 0.92]	0.989209	[0.98; 1.00]	1.01509	[1.00; 1.03]	1.00434	[0.99; 1.01]
ISCED15 level 3-5	529165	1	-	0.876371	[0.86; 0.90]	0.904088	[0.88; 0.93]	0.984349	[0.97; 0.99]	1.02044	[1.00; 1.04]	1.01976	[1.01; 1.03]
ISCED15 level 6-8	319925	1	-	0.890498	[0.86; 0.92]	0.96744	[0.94; 1.00]	1.02173	[1.01; 1.04]	1.1104	[1.09; 1.14]	1.08058	[1.06; 1.10]
Disposable income
Lowest quintile	419122	1	-	0.859689	[0.83; 0.89]	0.88582	[0.85; 0.92]	0.996824	[0.98; 1.01]	1.02345	[1.00; 1.05]	1.00022	[0.98; 1.02]
Second quintile	422225	1	-	0.871202	[0.84; 0.90]	0.880008	[0.85; 0.91]	0.976728	[0.96; 0.99]	1.01389	[0.99; 1.04]	0.982387	[0.96; 1.00]
Third quintile	424081	1	-	0.887206	[0.86; 0.91]	0.902242	[0.88; 0.93]	0.972574	[0.96; 0.98]	0.979337	[0.96; 1.00]	0.962074	[0.95; 0.98]
Fourth quintile	425069	1	-	0.881855	[0.86; 0.90]	0.903622	[0.88; 0.93]	0.984054	[0.97; 0.99]	0.989069	[0.97; 1.01]	0.965031	[0.95; 0.98]
Highest quintile	424457	1	-	0.882798	[0.87; 0.90]	0.915824	[0.90; 0.94]	0.977928	[0.97; 0.99]	0.993589	[0.98; 1.01]	0.993117	[0.98; 1.00]
Healthcare usage
Rare	439469	1	-	0.866361	[0.84; 0.90]	0.944924	[0.91; 0.98]	1.00555	[0.99; 1.02]	0.992594	[0.97; 1.02]	0.969786	[0.95; 0.99]
Low	491164	1	-	0.872149	[0.85; 0.89]	0.88141	[0.86; 0.91]	0.97582	[0.96; 0.99]	0.986285	[0.97; 1.01]	0.980268	[0.96; 1.00]
Average	467980	1	-	0.872286	[0.85; 0.89]	0.8966	[0.87; 0.92]	0.98338	[0.97; 0.99]	1.01137	[0.99; 1.03]	0.992981	[0.98; 1.01]
High	404486	1	-	0.890388	[0.87; 0.91]	0.90738	[0.88; 0.93]	0.986473	[0.98; 1.00]	1.02115	[1.00; 1.04]	0.994377	[0.98; 1.01]
Frequent	416901	1	-	0.907605	[0.89; 0.93]	0.932349	[0.91; 0.96]	0.984133	[0.97; 0.99]	1.02403	[1.01; 1.04]	1.02038	[1.01; 1.03]
* Adjusted for month, year and age at invitation; PR=prevalence ratio; CI=confidence interval; ISCED=International Standard Classification of Education; Information on cohabitation status was only available from Statistics Denmark until the end of February 2021 , whereas all other socioeconomic variables were available until end of the study period.
